# Supplementary material
Source: PubMed Central journal article supplement (PMC5075276)
Supplement: NIHMS792743-supplement-10439_2016_1619_MOESM1_ESM.pdf [file NIHMS792743-supplement-10439_2016_1619_MOESM1_ESM.pdf]

## Supplemental Figures

**FIGURE. S1.** UV light intensity vs distance for different sources used for crosslinking printed hydrogels. (A) Low Power 4 Nichia LED Array NCSU033A LEDs (B) Spectroline Lamp 365 nm EN280L single bulb, 2.0 mW/cm<sup>2</sup> (C) Underside view of High Powered 4 LED Array and circulation heat sink, 136mW/cm<sup>2</sup>, 60 Ohm resistance per LED, Nichia 365 nm UV LED NC4U133A (D) Side view of High Powered LED array at printing distance with tip in contact with printing surface. (E) Intensity measured with radiometer. Power fit data and extrapolated to generate intensity estimates at print surface (Table 4.1). Plotted are the intensity vs distance for the light meter sensor centered under the high powered LED array mounted on the syringe carriage (C 4 HLED), sensor under the right syringe tip (RT 4 HLED), sensor under the left syringe tip (LT 4 HLED), sensor under single high power LED (HLED), sensor under single low power LED with resistance set at 25 Ohms (LLED 25 Ohm), under single low power LED with resistance set at 33 Ohms (LLED 33 Ohm), single low power LED with resistance set at 55 Ohms (LLED 55 Ohm), and sensor under the Spectroline lamp.

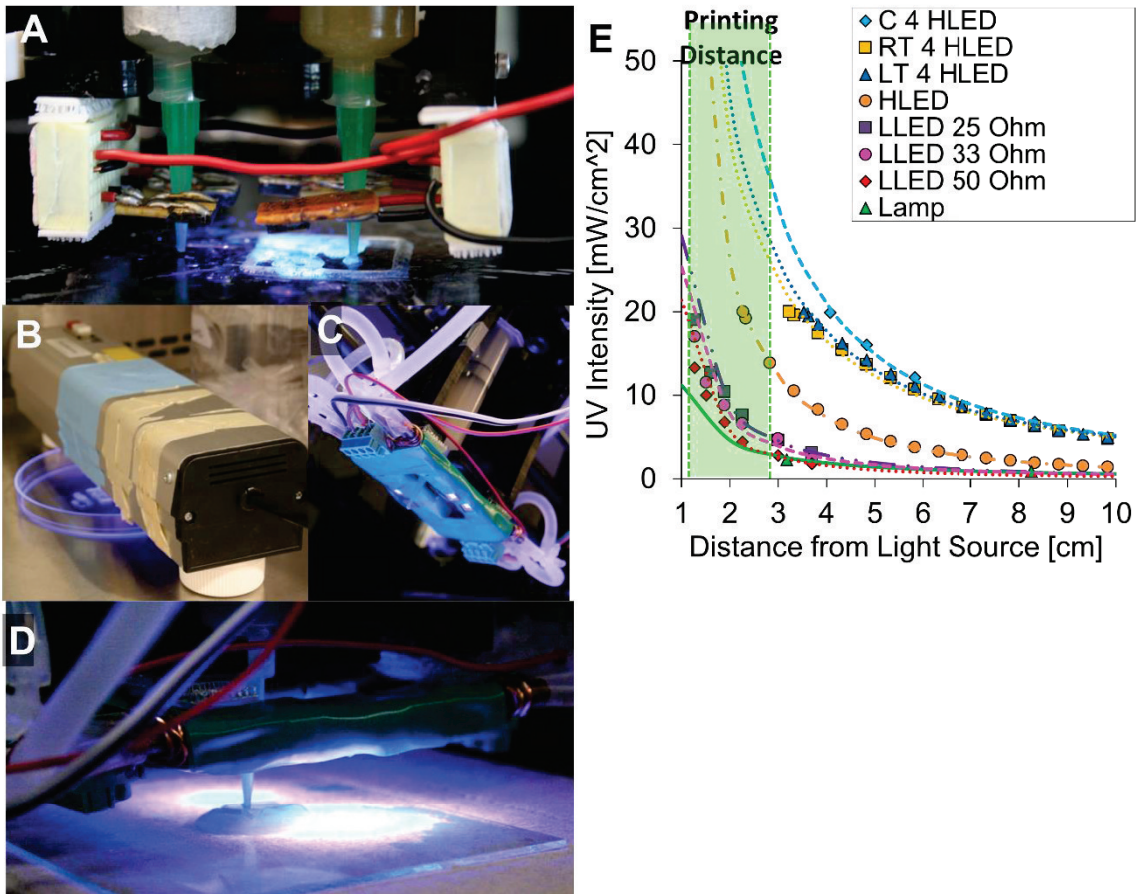



**FIGURE. S3.** Viability in HAVIC/VA086 hydrogels. (A) Representative images of Live/Dead stained HAVIC gels crosslinked at 2 mW/cm<sup>2</sup> after up to Day 7 culture. Scale bars are 100  $\mu$ m.

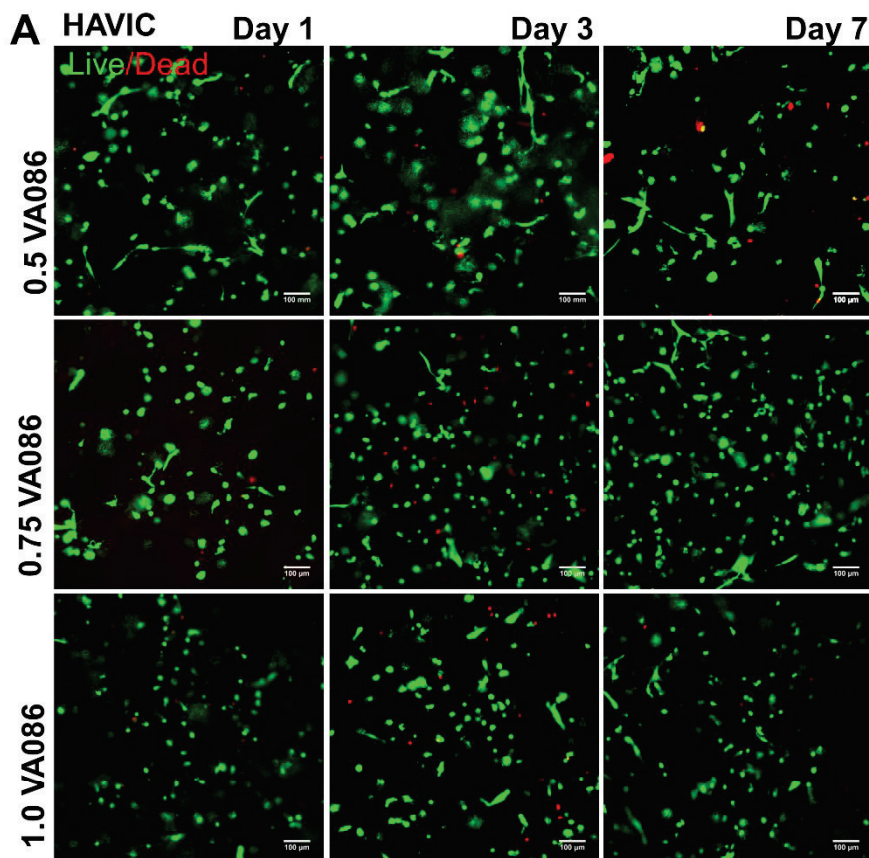

**FIGURE. S4.** (A) Viability in HASSMC/Irgacure hydrogels. Representative images of Live/Dead stained HASSMC gels crosslinked at 2 mW/cm<sup>2</sup> after up to Day 7 culture. Scale bars are 100  $\mu$ m.

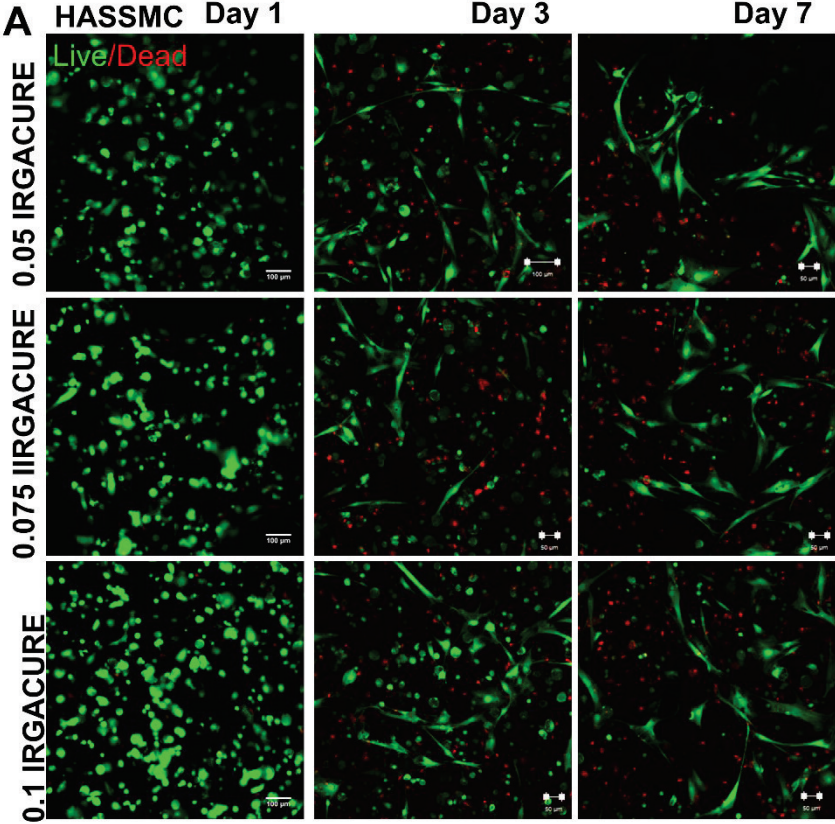

**FIGURE. S5.** Viability in HASSMC/VA086 hydrogels. (A) Representative images of Live/Dead stained HASSMC gels crosslinked at 2 mW/cm<sup>2</sup> after up to Day 7 culture. Scale bars are 100 μm.

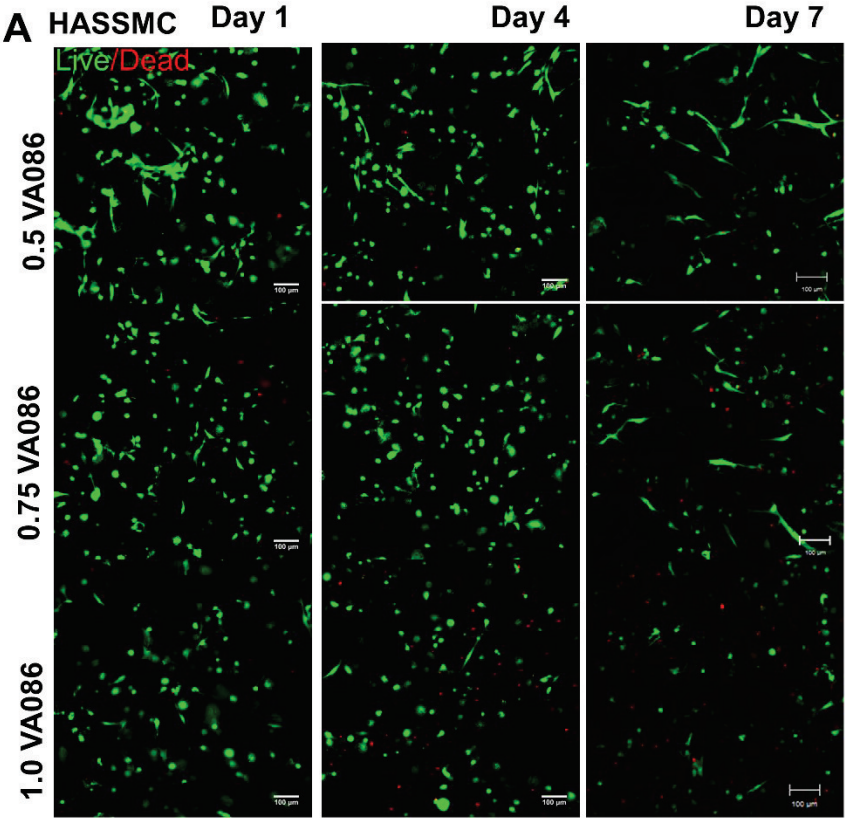

**FIGURE. S6.** Viability in HADMSC/Irgacure hydrogels. (A) Representative images of Live/Dead stained HADMSC gels crosslinked at 2 mW/cm<sup>2</sup> after up to Day 7 culture. Scale bars are 100 μm.

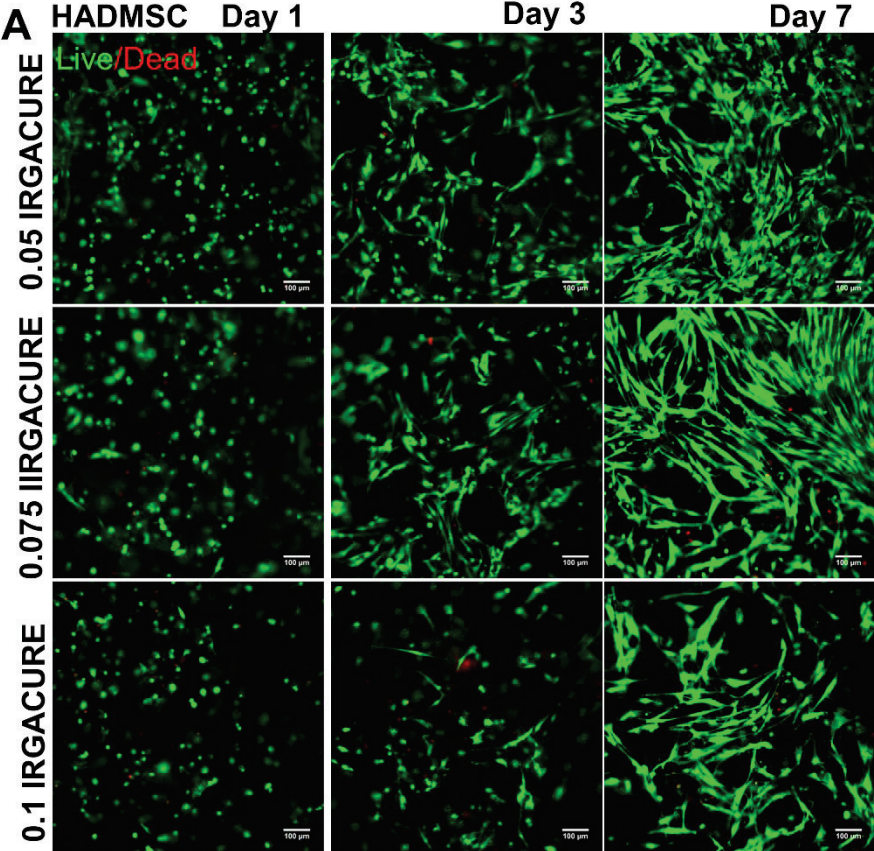

**FIGURE. S7.** Viability in HADMSC/VA086 hydrogel. (A) Representative images of Live/Dead stained HADMSC gels crosslinked at 2 mW/cm<sup>2</sup> after up to Day 7 culture. Scale bars are 100  $\mu$ m.

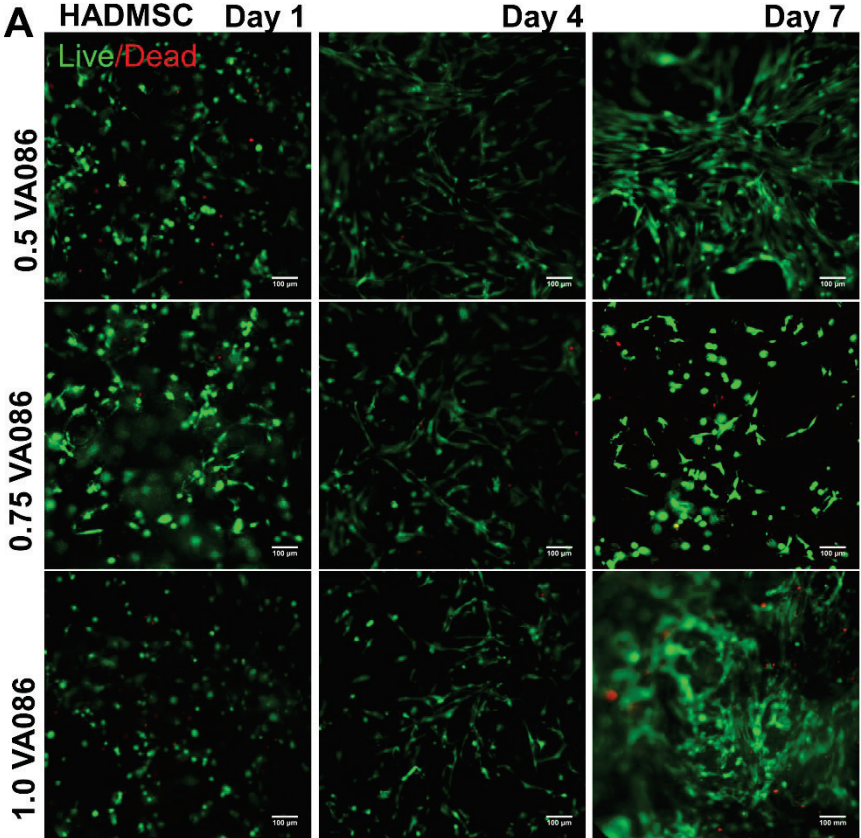

**FIGURE. S8.** Representative images of encapsulated DCF/CTR labeled HBSS and catalase treated cells taken directly after crosslinking of hydrogel.(A) HAVIC (B) HASSMC (C) HADMSC. Green is the DCF indicating oxidative stress and red is cell tracker red staining the cytoplasm. Scale bars are 50  $\mu$ m.

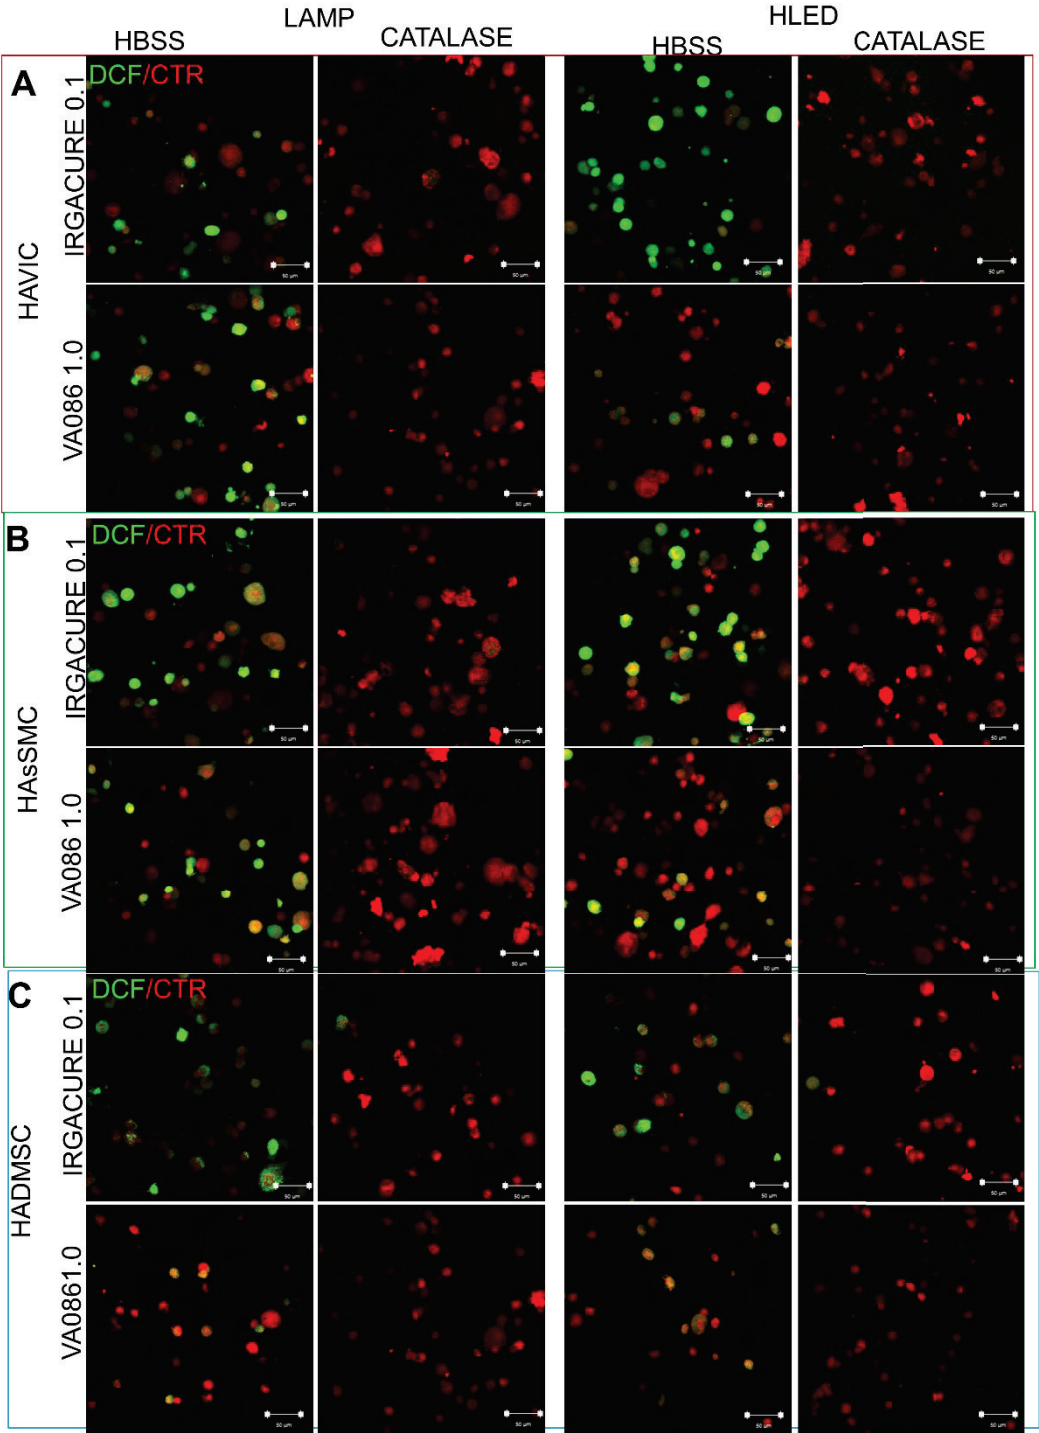



**FIGURE. S9.** Linear fit of percent of encapsulated cells experiencing general oxidative stress versus relative fluorescence of general oxidative stress indicator in encapsulated cell-hydrogels. (A) Diagram of how foaming in VA086 hydrogels crosslinked with HLED array would cause higher signal in the multi-well plate reader set on top read. (B) Linear fit of percentage of cells displaying oxidative stress in confocal images versus relative fluorescence of cell-hydrogel disks for all 24 conditions. 3 cell types, 2 light sources, 2 cell treatments (HBSS and Catalase), 2 photoinitiator conditions. All error bars are standard error of the mean. (C) Excluding HLED/VA086 data and refit percentage of cells displaying oxidative stress in confocal images versus relative fluorescence of cell-hydrogel disk.

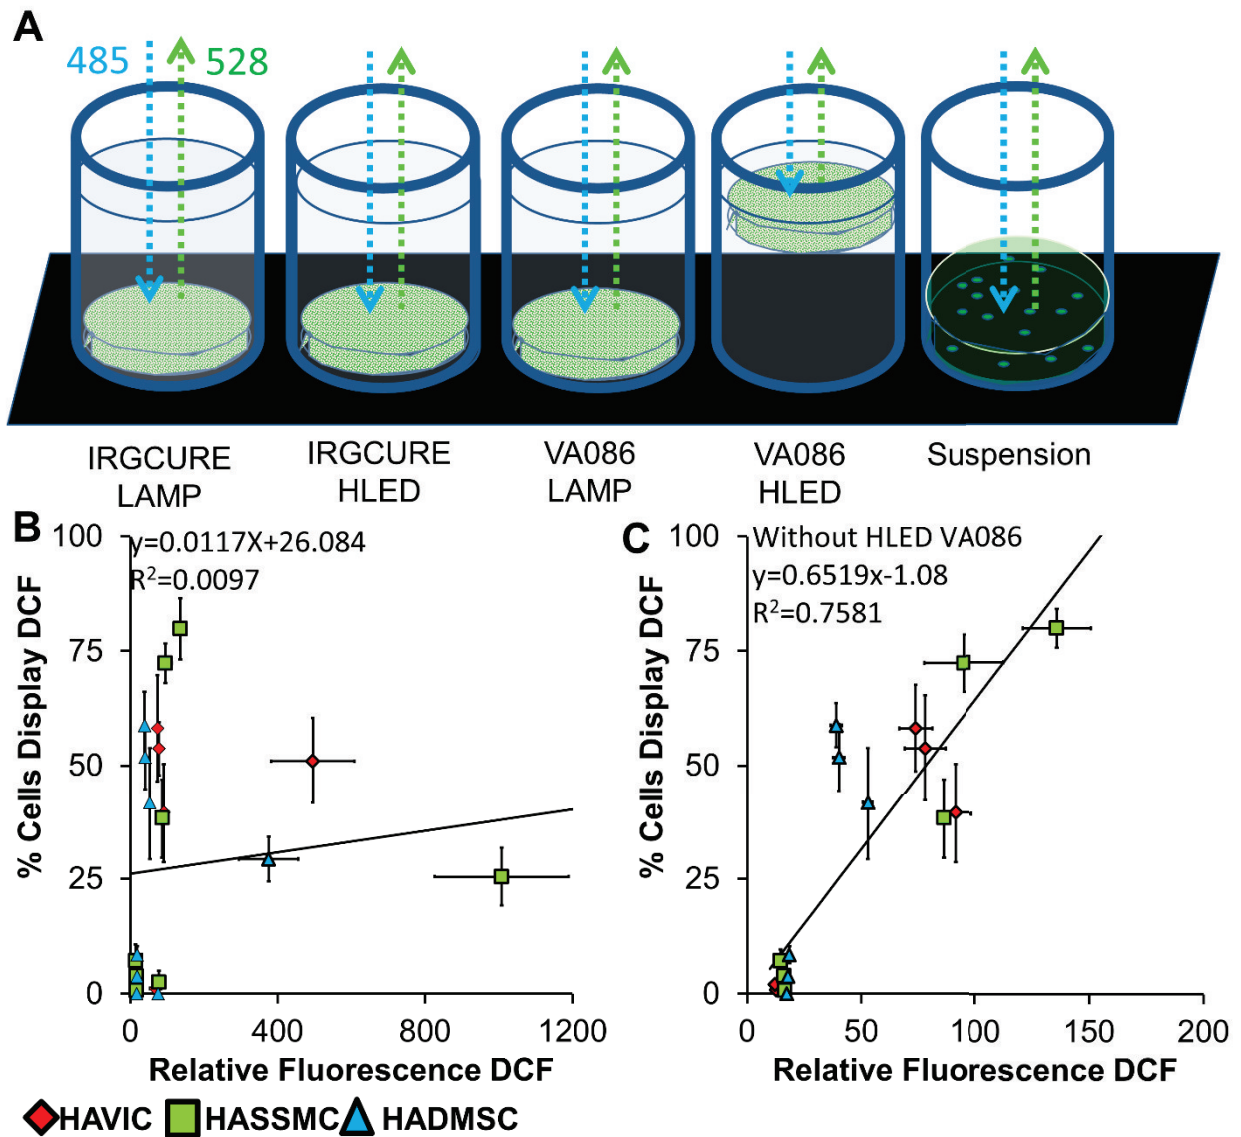

**FIGURE. S10.** Representative images of HBSS and catalase treated cells encapsulated then cultured to Day 3 then stained with Live/Dead. (A) HAVIC, (B) HASSMC (C) HADMSC. Scale bars are 100  $\mu\text{m}$ .

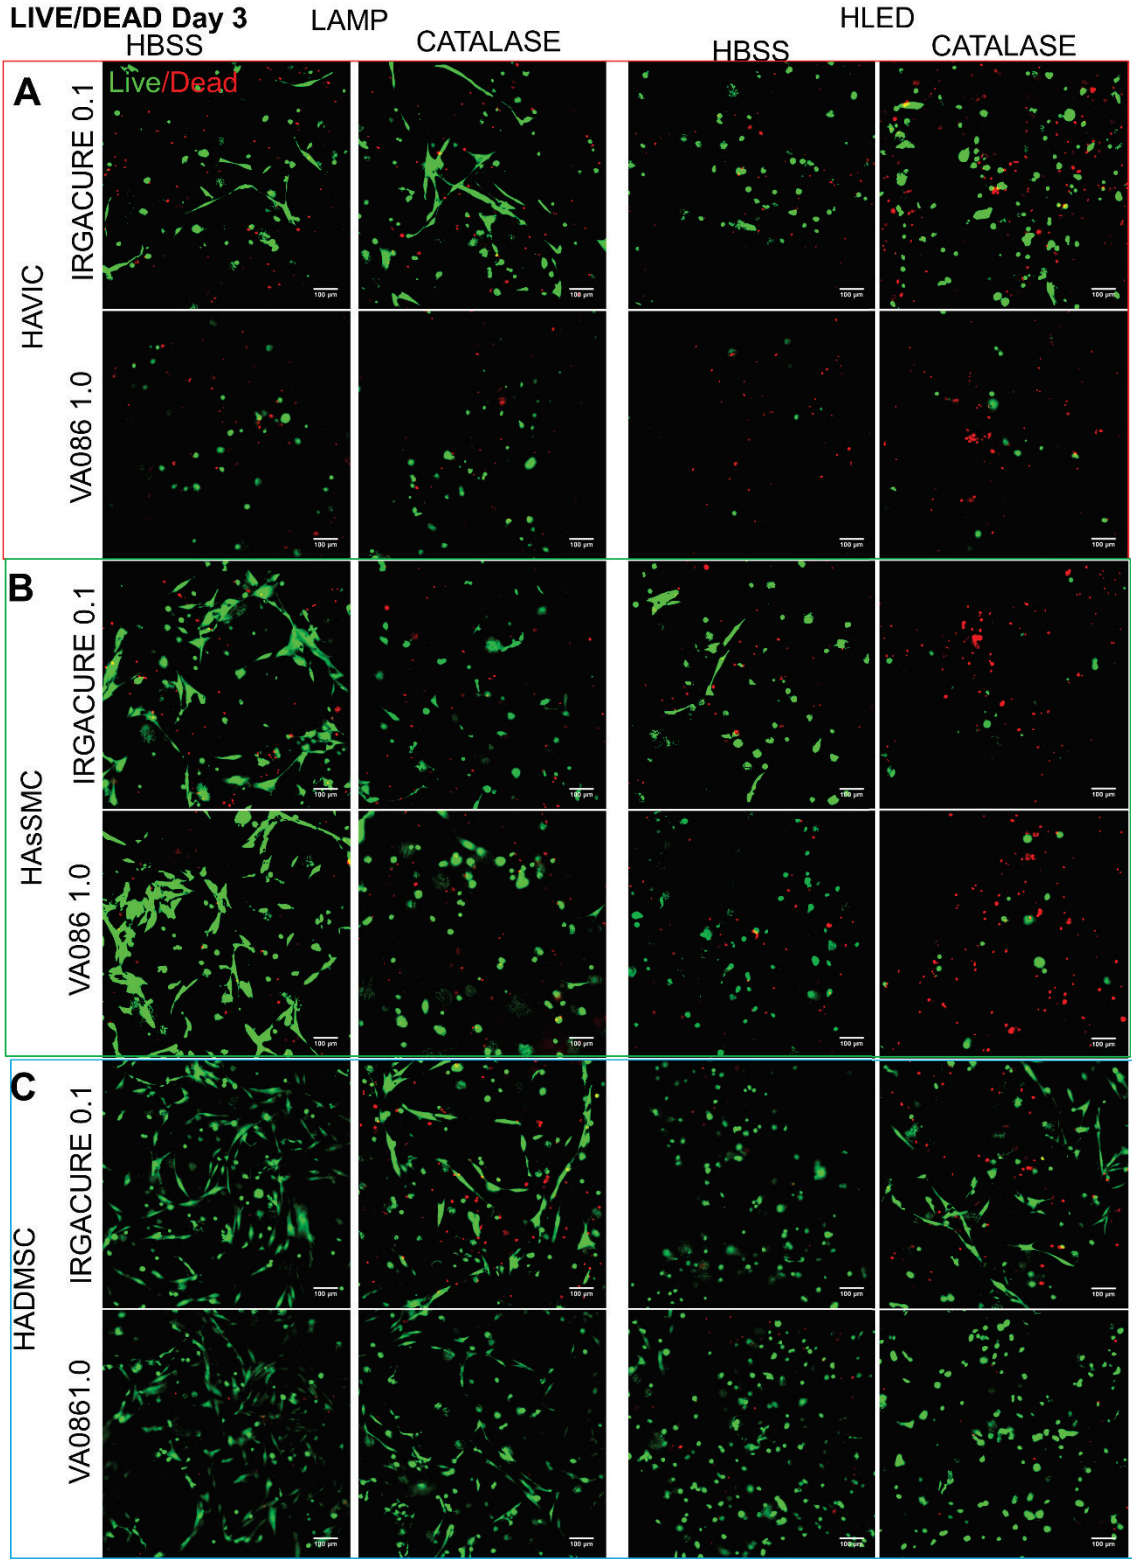

**FIGURE. S11.** Modulus  $E_{5\text{to}15}$  plotted against the percentage of live cells in the hydrogel of hydrogels made with 0.5-1.0w/v% VA086 and 0.05-0.1w/v% Irgacure crosslinked at 2mw/cm<sup>2</sup> on (A) day 1, (B) day 3, and (C) day 7 of culture.

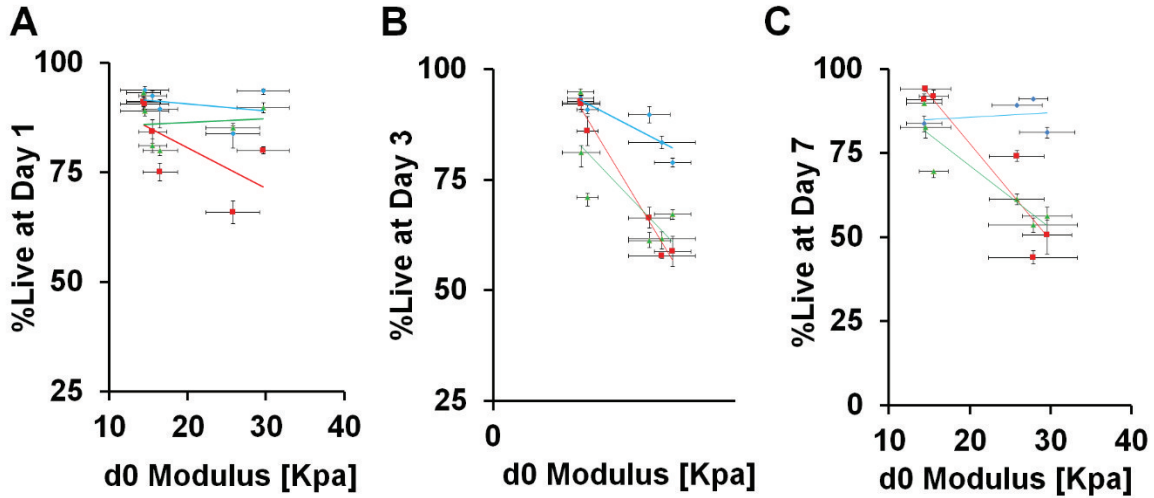

|                                                                                                   | Day 1                                     | Day 3                                     | Day 7                                     |
|---------------------------------------------------------------------------------------------------|-------------------------------------------|-------------------------------------------|-------------------------------------------|
| <b>HADMSC</b>    | $y = -0.1559x + 93.727$<br>$R^2 = 0.0773$ | $y = -0.7052x + 103.13$<br>$R^2 = 0.7795$ | $y = 0.1417x + 82.86$<br>$R^2 = 0.0424$   |
| <b>HAVIC</b>   | $y = -0.9181x + 98.961$<br>$R^2 = 0.3915$ | $y = -2.2756x + 124.08$<br>$R^2 = 0.9822$ | $y = -2.8883x + 135.73$<br>$R^2 = 0.8749$ |
| <b>HASSMC</b>  | $y = 0.0876x + 84.654$<br>$R^2 = 0.0124$  | $y = -1.4334x + 103.38$<br>$R^2 = 0.627$  | $y = -1.8611x + 108.5$<br>$R^2 = 0.831$   |

| TABLE S1. Extrapolation of light source measurements. |                         |                |                                                                         |                              |                         |       |       |
|-------------------------------------------------------|-------------------------|----------------|-------------------------------------------------------------------------|------------------------------|-------------------------|-------|-------|
| Light Source                                          | Power Fit               | R <sup>2</sup> | Intensity at Printing/<br>Crosslinking Surface<br>[mW/cm <sup>2</sup> ] | Distance from Source<br>[cm] | Energy [J] to 8 mm disk |       |       |
|                                                       |                         |                |                                                                         |                              | 3 min                   | 5min  | 7min  |
| Sensor Centered between syringe Tips, 4 HLEDS         | $y=175.61*(x)^{-1.531}$ | 0.9987         | 136                                                                     | 1.2                          | 12.30                   | 20.51 | 28.71 |
| Sensor Under Right Syringe Tip, 4 HLEDS               | $y=101.78*(x)^{-1.312}$ | 0.9887         | 82                                                                      | 1.2                          | 7.42                    | 12.37 | 17.31 |
| Sensor under left syringe tips 4HLEDS                 | $y=118.65*(x)^{-1.371}$ | 0.9953         | 94                                                                      | 1.2                          | 8.50                    | 14.17 | 19.84 |
| Single HLED (60 Ohm)                                  | $y=93.868*x^{-1.834}$   | 0.9993         | 67                                                                      | 1.2                          | 6.08                    | 10.13 | 14.18 |
| Single LLED (25 Ohm)                                  | $y=29.102*x^{-1.686}$   | 0.9976         | 21                                                                      | 1.2                          | 1.94                    | 3.23  | 4.52  |
| Single LLED (33 Ohm)                                  | $y = 25.365*x^{-1.699}$ | 0.9663         | 19                                                                      | 1.2                          | 1.68                    | 2.81  | 3.93  |
| Single LLED (50 Ohm)                                  | $y=21.38*x^{-1.878}$    | 0.9978         | 15                                                                      | 1.2                          | 1.37                    | 2.29  | 3.20  |
| Lamp                                                  | $y=11.194*x^{-1.281}$   | 0.976          | 2                                                                       | 2.7                          | 0.18                    | 0.30  | 0.42  |

**TABLE S1.** Extrapolation of light source measurements and intensity at printing and crosslinking surface. High powered light emitting diode (HLED), Low powered light emitting diode (LLED).

| <b>TABLE S2. Modulus, viability, and morphology from photocrosslinking conditions day 1 of culture.</b> |   |            |               |               |              |               |               |               |
|---------------------------------------------------------------------------------------------------------|---|------------|---------------|---------------|--------------|---------------|---------------|---------------|
| <b>Lamp 2mw/cm<sup>2</sup></b>                                                                          |   |            |               |               |              |               |               |               |
| <b>Con.</b>                                                                                             |   | <b>E</b>   | <b>HADSMC</b> |               | <b>HAVIC</b> |               | <b>HASSMC</b> |               |
| [w/v%]                                                                                                  |   | [kPa]      | [%live]       | Circ          | [%live]      | Circ          | [%live]       | Circ          |
| 0.025                                                                                                   | I | 22.8±3.1   | -             | -             | -            | -             | -             | -             |
| 0.05                                                                                                    | I | 37.1±4.8   | 93.5±0.4      | 0.24±0.0<br>1 | 79.9±0.8     | 0.70±0.0<br>1 | 89.7±1.1      | 0.68±0.0<br>1 |
| 0.075                                                                                                   | I | 42.0±8.2   | 89.5±2.2      | 0.22±0.0<br>4 | 75.1±2.0     | 0.73±0.0<br>1 | 79.9±1.1      | 0.70±0.1      |
| 0.1                                                                                                     | I | 40.9±4.1   | 83.9±1.8      | 0.16±0.0<br>4 | 65.8±2.6     | 0.78±0.0<br>1 | 85.2±1.0      | 0.70±0.0<br>1 |
| 0.25                                                                                                    | V | -          | -             | -             | -            | -             | -             | -             |
| 0.5                                                                                                     | V | 19.3±2.7   | 91.1±1.1      | 0.53±0.0<br>5 | 91.0±1.5     | 0.74±0.0<br>1 | 93.2±0.6      | 0.61±0.0<br>2 |
| 0.75                                                                                                    | V | 20.0±3.9   | 93.8±0.8      | 0.58±0.0<br>3 | 90.6±1.3     | 0.67±0.0<br>2 | 89.0±1.2      | 0.68±0.0<br>3 |
| 1.0                                                                                                     | V | 21.3±2.7   | 92.4±0.2      | 0.55±0.0<br>2 | 84.3±2.7     | 0.71±0.0<br>1 | 81.1±1.6      | 0.66±0.0<br>2 |
| <b>High Powered LED 136mw/cm<sup>2</sup></b>                                                            |   |            |               |               |              |               |               |               |
| 0.1                                                                                                     | I | 45.6±5.2   | -             | -             | -            | -             | -             | -             |
| 1.0                                                                                                     | V | 120.7±10.2 | -             | -             | -            | -             | -             | -             |

**TABLE S2**–Summary averages and standard error of mean of compressive modulus ( $E_{5to15}$ ) of crosslinked hydrogels made with different photoinitiator concentration (con.), photoinitiator type either Irgacure 2959 (I) or VA086 (V), percent live cells per condition at day 1, and circularity per condition. All cells handled in PBS and conditions photocrosslinked with the lamp at 2mW/cm<sup>2</sup>.

| <b>TABLE S3. Swelling ratios for Photocrosslinking conditions</b> |                  |                            |                       |
|-------------------------------------------------------------------|------------------|----------------------------|-----------------------|
| <b>Con.</b>                                                       | <b>Initiator</b> | <b>Intensity</b>           | <b>Swelling Ratio</b> |
| <b>[w/v%]</b>                                                     |                  | <b>[mW/cm<sup>2</sup>]</b> |                       |
| 0.025                                                             | I                | 2                          | 26.3±1.8              |
| 0.025                                                             | I                | 136                        | 24.0±1.1              |
| 0.1                                                               | I                | 2                          | 13.2±1.2              |
| 0.1                                                               | I                | 136                        | 10.2±0.7              |
| 0.5                                                               | V                | 136                        | 14.6±0.9              |
| 1.0                                                               | V                | 2                          | 19.9±0.3              |
| 1.0                                                               | V                | 136                        | 10.5±0.4              |

**TABLE S3.** Weight based swelling of crosslinked hydrogels made with different photoinitiator concentration (con.), photoinitiator type either Irgacure (I) or VA086 (V), and light source intensity during crosslinking.

**TABLE S4. Percentage of cells positive for general oxidative stress and relative fluorescence.**

| Con.                          |   | Int.                  | HADSMC     |            | HAVIC       |             | HASSMC      |              |
|-------------------------------|---|-----------------------|------------|------------|-------------|-------------|-------------|--------------|
|                               |   |                       | HBSS       | CAT        | HBSS        | CAT         | HBSS        | CAT          |
| [w/v%]                        |   | [mW/cm <sup>2</sup> ] | [%]        | [%]        | [%]         | [%]         | [%]         | [%]          |
| 0.1                           | I | 2                     | 58.8±7.3   | 3.8±1.8    | 58.2±11.7   | 0.8±0.8     | 72.4±6.7    | 7.2±3.5      |
| 1.0                           | V | 2                     | 41.5±12.3  | 0.0±0.0    | 39.5±10.9   | 3.2±2.5     | 38.3±8.7    | 0.8±0.8      |
| 0.1                           | I | 136                   | 51.8±6.9   | 8.5±1.9    | 53.8±5.8    | 2.1±1.4     | 79.9±6.7    | 3.9±0.9      |
| 1.0                           | V | 136                   | 29.3±4.8   | 0.0±0.0    | 51.0±9.5    | 1.2±1.1     | 25.5±6.3    | 2.5±2.5      |
| Relative Fluorescence Per Gel |   |                       |            |            |             |             |             |              |
|                               |   |                       |            |            |             |             |             |              |
| 0.1                           | I | 2                     | 39.0±2.4   | 17.9±1.0   | 73.9±7.2    | 12.8±0.4    | 135.9±14.8  | 14.7±0.2     |
| 1.0                           | V | 2                     | 52.9±2.1   | 17.3±0.3   | 91.4±7.1,   | 15.5±0.2    | 86.3±2.7    | 16.4±0.7     |
| 0.1                           | I | 136                   | 40.2±2.5   | 40.2±2.5   | 78.0±9.1    | 78.0±9.1    | 135.9±14.8  | 135.9±14.8   |
| 1.0                           | V | 136                   | 375.9±80.2 | 375.9±80.2 | 495.4±113.5 | 495.4±113.5 | 1007.8±82.2 | 1007.8±182.2 |

**TABLE S4.** Percentage of encapsulated cells that fluoresce green when labeled with DCF and were photoencapsulated. Conditions varied by photoinitiator concentration (con.), photoinitiator type either Irgacure (I) or VA086 (V), light intensity (Int.) cell type, and then treatment (HBSS control or catalase).

| <b>TABLE S5. Percentage and circularity of live cells with and without catalase treatment and photoencapsulation.</b> |   |                         |             |             |             |             |             |             |
|-----------------------------------------------------------------------------------------------------------------------|---|-------------------------|-------------|-------------|-------------|-------------|-------------|-------------|
| Con.                                                                                                                  |   | Int.                    | HADSMC      |             | HAVIC       |             | HASSMC      |             |
|                                                                                                                       |   |                         | HBSS        | CAT         | HBSS        | CAT         | HBSS        | CAT         |
| [w/v%]                                                                                                                |   | [m w/c m <sup>2</sup> ] | [%live]     | [%live]     | [%live]     | [%live]     | [%live]     | [%live]     |
| 0.1                                                                                                                   | I | 2                       | 92.8±1.7    | 62.0±2.5    | 34.2±5.9    | 49.2±2.4    | 60.7±1.8    | 41.3±3.0    |
| 1.0                                                                                                                   | V | 2                       | 83.6±4.8    | 93.7±0.9    | 23.4±3.5    | 46.1±1.8    | 74.4±2.9    | 43.7±1.4    |
| 0.1                                                                                                                   | I | 136                     | 85.2±1.4    | 59.2±2.5    | 38.5±3.9    | 41.3±3.0    | 44.8±5.7    | 24.4±3.8    |
| 1.0                                                                                                                   | V | 136                     | 76.5±6.1    | 80.0±4.9    | 7.44±1.2    | 15.8±1.3    | 45.1±4.6    | 25.0±12.8   |
| <b>Circularity</b>                                                                                                    |   |                         |             |             |             |             |             |             |
| 0.1                                                                                                                   | I | 2                       | 0.609±0.042 | 0.574±0.037 | 0.686±0.013 | 0.650±0.020 | 0.559±0.018 | 0.661±0.009 |
| 1.0                                                                                                                   | V | 2                       | 0.532±0.010 | 0.568±0.030 | 0.787±0.17  | 0.699±0.019 | 0.554±0.033 | 0.742±0.011 |
| 0.1                                                                                                                   | I | 136                     | 0.767±0.013 | 0.678±0.013 | 0.657±0.063 | 0.779±0.029 | 0.697±0.032 | 0.728±0.015 |
| 1.0                                                                                                                   | V | 136                     | 0.726±0.014 | 0.735±0.008 | 0.759±0.021 | 0.751±0.029 | 0.759±0.021 | 0.751±0.028 |

**TABLE S5.** Percentage and circularity of live cells with and without catalase treatment and photoencapsulation. Conditions varied by photoinitiator concentration (con.), photoinitiator type either Irgacure (I) or VA086 (V), light intensity (Int.) cell type, and then treatment (HBSS control or catalase).



**TABLE S6.** Results of Two-Way ANOVA: Analyzing the Factors VA086 Photoinitiator Concentration and Light Source Intensity on Hydrogel Swelling Ratio.

| Source of Variation     | Degrees of Freedom | Sums of Squares | Means Square | F Ratio | P value (probability of making type one error) |
|-------------------------|--------------------|-----------------|--------------|---------|------------------------------------------------|
| Light Intensity Source  | 1                  | 474.8           | 474.8        | 105.6   | <0.0001*                                       |
| VA086 Concentration     | 1                  | 112.2           | 112.2        | 25.0    | <0.0001*                                       |
| Light Intensity X VA086 | 1                  | 3.1             | 3.1          | 0.7     | 0.4151                                         |
| Error                   | 21                 | 94.4            | 4.5          |         |                                                |

**TABLE S6.** VA086 two way ANOVA for swelling ratio data. A two-way ANOVA was conducted that examined the effect that photoinitiator concentration and light source have on hydrogel swelling ratio. In VA086 hydrogel there was not a statistically significant interaction between the effect of photoinitiator concentration and the effect of light source on hydrogel swelling ratio ( $F=0.4151$   $p=0.4151$ ). However, both light intensity and photoinitiator concentration independently affect the swelling ratio of the photocrosslinked hydrogel ( $p<0.0001^*$ ).

**TABLE S7.** Results of Two-Way ANOVA: Analyzing the Factors Irgacure Photoinitiator Concentration and Light Source Intensity on Hydrogel Swelling Ratio.

| Source of Variation        | Degrees of Freedom | Sums of Squares | Means Square | F Ratio | P value (probability of making type one error) |
|----------------------------|--------------------|-----------------|--------------|---------|------------------------------------------------|
| Light Intensity Source     | 1                  | 50.3            | 50.3         | 5.2     | 0.0319*                                        |
| Irgacure Concentration     | 1                  | 1246.6          | 1246.6       | 128.0   | <0.0001*                                       |
| Light Intensity X Irgacure | 1                  | 1.1             | 1.1          | 0.1     | 0.7428                                         |
| Error                      | 25                 | 243.4           | 4.5          |         |                                                |

**TABLE S7.** Irgacure two way ANOVA for swelling ratio data. A two-way ANOVA was conducted that examined the effect that photoinitiator concentration and light source have on hydrogel swelling ratio. In Irgacure hydrogel there was not a statistically significant interaction between the effect of photoinitiator concentration and the effect of light source on hydrogel swelling ratio ( $F=0.1101$   $p=0.7428$ ). However, both light intensity and photoinitiator concentration independently affect the swelling ratio of the photocrosslinked hydrogel.

**TABLE S8.** Results of Two-Way ANOVA: Analyzing the Factors Cell Type and Irgacure Photoinitiator Concentration on Percentage of Live Cells at Day 1 of Culture

| Source of Variation    | Degrees of Freedom | Sums of Squares | Means Square | F Ratio | P value (probability of making type one error) |
|------------------------|--------------------|-----------------|--------------|---------|------------------------------------------------|
| Irgacure Concentration | 2                  | 556.0           | 278.0        | 27.5    | <0.0001*                                       |
| Cell Type              | 2                  | 1519.2          | 759.6        | 75.2    | <0.0001*                                       |
| Irgacure X Cell        | 4                  | 238.2           | 59.5         | 5.9     | 0.0015                                         |
| Error                  | 27                 | 272.7           | 10.1         |         |                                                |

**TABLE S8.** A two-way ANOVA was conducted that examined the effect that cell type and photoinitiator concentration on the percentage of live cells observed at day 1 in culture. At day 1 in culture there was a statistically significant interaction between the effect of cell type and the effect of photoinitiator concentration on the percentage of live cells ( $F=5.894$   $p=0.0015$ ). For hydrogels prepared with Irgacure at day 1 in culture the effect of photoinitiator concentration on the percentage of live cells depends on the cell type encapsulated, with photoinitiator concentration having a greater effect on HAVIC and HASSMC than on HADMSC.

| <b>TABLE S9.</b> Results of Two-Way ANOVA: Analyzing the Factors Cell Type and VA086 Photoinitiator Concentration on Percentage of Live Cells at Day 1 of Culture |                    |                 |              |         |                                                |
|-------------------------------------------------------------------------------------------------------------------------------------------------------------------|--------------------|-----------------|--------------|---------|------------------------------------------------|
| Source of Variation                                                                                                                                               | Degrees of Freedom | Sums of Squares | Means Square | F Ratio | P value (probability of making type one error) |
| VA086 Concentration                                                                                                                                               | 2                  | 228.7           | 114.4        | 12.6    | 0.0002*                                        |
| Cell Type                                                                                                                                                         | 2                  | 129.3           | 64.6         | 7.1     | 0.00035*                                       |
| VA086X Cell                                                                                                                                                       | 4                  | 143.3           | 35.8         | 3.9     | 0.0127*                                        |
| Error                                                                                                                                                             | 25                 | 226.4           | 9.1          |         |                                                |

**TABLE S9.** A two-way ANOVA was conducted that examined the effect that cell type and photoinitiator concentration on the percentage of live cells observed at day 1 in culture. There was a statistically significant interaction between the effects of cell type and VA086 photoinitiator concentration on the percentage of live cells. The effect of VA086 photoinitiator concentration on the percentage of live cells depends on the cell type encapsulated ( $F=3.96$   $p=0.0127$ ), with photoinitiator concentration having a greater effect on HAVIC and HASSMC than on HADMSC.

**TABLE S10.** Results of Two-Way ANOVA: Analyzing the Factors Irgacure Photoinitiator Concentration and Day in Culture on Percentage of Live HADMSC.

| Source of Variation    | Degrees of Freedom | Sums of Squares | Means Square | F Ratio | P value (probability of making type one error) |
|------------------------|--------------------|-----------------|--------------|---------|------------------------------------------------|
| Irgacure Concentration | 2                  | 579.6           | 289.8        | 23.6    | <0.0001*                                       |
| Day                    | 2                  | 153.3           | 76.6         | 6.2     | 0.0060*                                        |
| Irgacure X Day         | 4                  | 72.6            | 18.2         | 1.6     | 0.2149                                         |
| Error                  | 27                 | 332.1           | 12.3         |         |                                                |

**TABLE S10.** A two-way ANOVA was conducted that examined the effect photoinitiator concentration and day in culture have on the percentage of live cells for HADMSC. For HADMSC here was not a statistically significant interaction between the effects photoinitiator concentration and day in culture on the percentage of live cells in hydrogels prepared with Irgacure (F=1.555 p=0.2149). As day in culture increases and as Irgacure photoinitiator concentration increases, the percentage of live cells decreases (**Fig.3C**).

**TABLE S11.** Results of Two-Way ANOVA: Analyzing the Factors VA086 Photoinitiator Concentration and Day in Culture on Percentage of Live HADMSC.

| Source of Variation | Degrees of Freedom | Sums of Squares | Means Square | F Ratio | P value (probability of making type one error) |
|---------------------|--------------------|-----------------|--------------|---------|------------------------------------------------|
| VA086 Concentration | 2                  | 0.2             | 0.1          | 0.0384  | 0.8469                                         |
| Day                 | 1                  | 8.7             | 8.7          | 0.9464  | 0.4077                                         |
| VA086 X Day         | 2                  | 16.3            | 8.2          | 1.7705  | 0.2002                                         |
| Error               | 17                 | 78.3            | 4.6          |         |                                                |

**TABLE S11.** A two-way ANOVA was conducted that examined the effect photoinitiator concentration and day in culture have on the percentage of live cells for HADMSC. For HADMSC there was not a statistically significant interaction between the effects photoinitiator concentration and day in culture on the percentage of live cells ( $F=1.771$   $p=0.0.2002$ ). Post-hoc Tukey HSD  $p<0.05$  found no significant differences between day in culture or between photoinitiator concentration indicated by matching letters (**Fig.3D**).

**TABLE S12.** Results of Two-Way ANOVA: Analyzing the Factors Irgacure Photoinitiator Concentration and Day in Culture on Percentage of Live HAVIC.

| Source of Variation    | Degrees of Freedom | Sums of Squares | Means Square | F Ratio | P value (probability of making type one error) |
|------------------------|--------------------|-----------------|--------------|---------|------------------------------------------------|
| Irgacure Concentration | 2                  | 1924.9          | 962.4        | 33.04   | <0.0001*                                       |
| Day                    | 2                  | 1764.3          | 882.1        | 30.00   | <0.0001*                                       |
| Irgacure X Day         | 4                  | 842.6           | 210.6        | 7.16    | 0.0005*                                        |
| Error                  | 27                 | 793.8           | 29.4         |         |                                                |

**TABLE S12.** A two-way ANOVA was conducted that examined the effect photoinitiator concentration and day in culture have on the percentage of live cells for HAVIC. There was a statistically significant interaction between the effects of day in culture and photoinitiator concentration on the percentage of live cells. The effect of photoinitiator concentration on the percentage of live cells depends on the day in culture ( $F=7.165$   $p=0.0005$ ), with photoinitiator concentration having a greater effect on the percentage of live cells at later culture times (**Fig.3E**)

**TABLE S13.** Results of Two-Way ANOVA: Analyzing the Factors VA086 Photoinitiator Concentration and Day in Culture on Percentage of Live HAVIC.

| Source of Variation | Degrees of Freedom | Sums of Squares | Means Square | F Ratio | P value (probability of making type one error) |
|---------------------|--------------------|-----------------|--------------|---------|------------------------------------------------|
| VA086 Concentration | 2                  | 79.9            | 39.9         | 2.71    | 0.0853                                         |
| Day                 | 2                  | 164.1           | 82.0         | 5.56    | 0.0098*                                        |
| VA086 X Day         | 4                  | 75.7            | 18.9         | 1.28    | 0.3018                                         |
| Error               | 26                 | 383.6           | 14.7         |         |                                                |

**TABLE S13.** A two-way ANOVA was conducted that examined the effect photoinitiator concentration and day in culture have on the percentage of live cells for HAVIC in hydrogels prepared with VA086. There was not a statistically significant interaction between the effects of day in culture and photoinitiator concentration on the percentage of live cells ( $F=1.284$   $p=0.3018$ ) (**Fig.3F**).



**TABLE S14.** Results of Two-Way ANOVA: Analyzing the Factors Irgacure Photoinitiator Concentration and Day in Culture on Percentage of Live HASSMC.

| Source of Variation    | Degrees of Freedom | Sums of Squares | Means Square | F Ratio | P value (probability of making type one error) |
|------------------------|--------------------|-----------------|--------------|---------|------------------------------------------------|
| Irgacure Concentration | 2                  | 4828.7          | 2414.3       | 210.56  | <0.0001*                                       |
| Day                    | 2                  | 197.5           | 98.7         | 8.61    | 0.0014*                                        |
| Irgacure X Day         | 4                  | 182.6           | 45.6         | 3.98    | 0.0124*                                        |
| Error                  | 25                 | 286.6           | 11.4         |         |                                                |

**TABLE S14.** A two-way ANOVA was conducted that examined the effect photoinitiator concentration and day in culture have on the percentage of live cells for HASSMC. There was a statistically significant interaction between the effects of day in culture and photoinitiator concentration on the percentage of live cells ( $F=3.9815$   $p=0.0124$ ) (Fig.3G).

**TABLE S15.** Results of Two-Way ANOVA: Analyzing the Factors VA086 Photoinitiator Concentration and Day in Culture on Percentage of Live HASSMC.

| Source of Variation | Degrees of Freedom | Sums of Squares | Means Square | F Ratio | P value (probability of making type one error) |
|---------------------|--------------------|-----------------|--------------|---------|------------------------------------------------|
| VA086 Concentration | 2                  | 278.7           | 139.3        | 6.3402  | 0.0057*                                        |
| Day                 | 2                  | 1831.9          | 915.9        | 41.671  | <0.0001*                                       |
| VA086 X Day         | 4                  | 140.7           | 35.1         | 1.6005  | 0.204                                          |
| Error               | 26                 | 571.5           | 21.9         |         |                                                |

**TABLE S15.** A two-way ANOVA was conducted that examined the effect photoinitiator concentration and day in culture have on the percentage of live cells for HASSMC in hydrogels prepared with VA086. There was not a statistically significant interaction between the effects of day in culture and photoinitiator concentration on the percentage of live cells ( $F=1.6005$   $p=0.204$ ). Photoinitiator concentration had more effect at longer culture times (Fig.3H).

**TABLE S16.** Results of Two-Way ANOVA: Analyzing the Factors Cell Type and Irgacure Photoinitiator Concentration on Circularity of Live Cells at Day 1 of Culture

| Source of Variation    | Degrees of Freedom | Sums of Squares | Means Square | F Ratio | P value (probability of making type one error) |
|------------------------|--------------------|-----------------|--------------|---------|------------------------------------------------|
| Irgacure Concentration | 2                  | 0.015           | 0.007        | 12.540  | <0.0001*                                       |
| Cell Type              | 2                  | 0.097           | 0.048        | 82.504  | <0.0001*                                       |
| Irgacure X Cell        | 4                  | 0.018           | 0.004        | 7.504   | 0.0003*                                        |
| Error                  | 27                 | 0.016           | 0.001        |         |                                                |

**TABLE S16.** A two-way ANOVA was conducted that examined the effect that cell type and photoinitiator concentration on the circularity of live cells observed at day 1 in culture. At day 1 in culture there was a statistically significant interaction between the effect of cell type and the effect of photoinitiator concentration on the circularity of live cells ( $F=7.5042$   $p=0.0003^*$ ). At day 1 in culture for hydrogels prepared with Irgacure the circularity of live cells depends on the cell type, and encapsulated and HAVIC and HASSMC are more round than HADMSC (**Fig. 4A**).

**TABLE S17.** Results of Two-Way ANOVA: Analyzing the Factors Cell Type and VA086 Photoinitiator Concentration on Circularity of Live Cells at Day 1 of Culture

| Source of Variation | Degrees of Freedom | Sums of Squares | Means Square | F Ratio | P value (probability of making type one error) |
|---------------------|--------------------|-----------------|--------------|---------|------------------------------------------------|
| VA086 Concentration | 2                  | 0.001           | 0.000        | 0.151   | 0.861                                          |
| Cell Type           | 2                  | 0.140           | 0.070        | 27.503  | <0.0001*                                       |
| VA086 X Cell        | 4                  | 0.019           | 0.005        | 1.888   | 0.1438                                         |
| Error               | 25                 | 0.064           | 0.003        |         |                                                |

**TABLE S17.** A two-way ANOVA was conducted that examined the effect that cell type and VA086 photoinitiator concentration on the circularity of live cells observed at day 1 in culture. At day 1 in culture there was not a statistically significant interaction between the effect of cell type and the effect of photoinitiator concentration on the circularity of live cells ( $F=1.8884$   $p=0.1438^*$ ). However, at day 1 in culture for hydrogels prepared with VA086, the circularity of live cells does depend on the cell type (**Fig.4B**).

**TABLE S18.** Results of Three-Way ANOVA: Analyzing the Factors Cell Type, Light Intensity, and Pre-encapsulation Treatment on Percentage of Cells that are Positive/green fluorescent DCF in Hydrogels prepared with Irgacure.

| Source of Variation                     | Degrees of Freedom | Sums of Squares | Means Square | F Ratio | P value (probability of making type one error) |
|-----------------------------------------|--------------------|-----------------|--------------|---------|------------------------------------------------|
| Light Intensity                         | 1                  | 0.6             | 0.6          | 0.00    | 0.953                                          |
| Cell Type                               | 2                  | 1368.1          | 684.0        | 3.84    | 0.0296                                         |
| Light Intensity X Cell Type             | 2                  | 33.2            | 16.6         | 0.09    | 0.9111                                         |
| Treatment                               | 1                  | 42347.2         | 42347.2      | 237.76  | <0.0001*                                       |
| Light Intensity X Cell Type X Treatment | 1                  | 15.1            | 15.1         | 0.08    | 0.77                                           |
| Cell Type X Treatment                   | 2                  | 1038.8          | 519.4        | 2.92    | 0.07                                           |
| Light Intensity X Cell Type X Treatment | 2                  | 282.9           | 141.4        | 0.79    | 0.46                                           |
| Error                                   | 41                 | 7302.3          | 178.1        |         |                                                |

**TABLE S18.** A three-way ANOVA was conducted that examined the effect that cell type, light intensity, and pre-encapsulation treatment with catalase has on the percentage of cells that will exhibit DCF fluorescence immediately after the hydrogel prepared with Irgacure is photocrosslinked around them. There was not a statistically significant interaction between the effect of light intensity, the effect of cell type, and the effect of treatment on the percentage of DCF positive cells ( $F=0.46$   $p=0.46$ ). Catalase treatment reduces the percentage of cells experiencing oxidative stress (**Fig.5A**).

Post-hoc Tukey HSD  $p<0.05$  non-matching letters

**TABLE S19.** Results of Three-Way ANOVA: Analyzing the Factors Cell Type, Light Intensity, and Pre-encapsulation Treatment on Percentage of Cells that are Positive/green fluorescent DCF in Hydrogels prepared with VA086.

| Source of Variation                     | Degrees of Freedom | Sums of Squares | Means Square | F Ratio | P value (probability of making type one error) |
|-----------------------------------------|--------------------|-----------------|--------------|---------|------------------------------------------------|
| Light Intensity                         | 1                  | 65.2            | 65.2         | 0.38    | 0.5399                                         |
| Cell Type                               | 2                  | 453.8           | 226.9        | 1.33    | 0.2763                                         |
| Light Intensity X Cell Type             | 2                  | 298.2           | 149.1        | 0.88    | 0.4251                                         |
| Treatment                               | 1                  | 15751.2         | 15751.2      | 92.55   | <0.0001*                                       |
| Light Intensity X Cell Type             | 1                  | 58.2            | 58.2         | 0.34    | 0.56                                           |
| Cell Type X Treatment                   | 2                  | 331.7           | 165.8        | 0.97    | 0.39                                           |
| Light Intensity X Cell Type X Treatment | 2                  | 490.1           | 245.1        | 1.44    | 0.25                                           |
| Error                                   | 36                 | 6127.1          | 170.2        |         |                                                |

**TABLE S19.** A three-way ANOVA was conducted that examined the effect that cell type, light intensity, and pre-encapsulation treatment with catalase has on the percentage of cells that will exhibit DCF fluorescence immediately after the hydrogel prepared with VA086. There was not a statistically significant interaction between the effect of light intensity, the effect of cell type, and the effect of treatment on the percentage of DCF positive cells ( $F=1.44$   $p=0.25$ ). Catalase reduces the percentage of cells experiencing oxidative stress (**Fig.5B**).

**TABLE S20.** Results of Three-Way ANOVA: Analyzing the Factors Cell Type, Light Intensity, and Pre-encapsulation Treatment on the intensity of green fluorescence DCF present in cell-hydrogels prepared with Irgacure.

| Source of Variation                     | Degrees of Freedom | Sums of Squares | Means Square | F Ratio | P value (probability of making type one error) |
|-----------------------------------------|--------------------|-----------------|--------------|---------|------------------------------------------------|
| Light Intensity                         | 1                  | 884.1           | 884.1        | 5.1     | 0.0289*                                        |
| Cell Type                               | 2                  | 13550.4         | 6775.2       | 38.9    | <0.0001*                                       |
| Light Intensity X Cell Type             | 2                  | 1160.7          | 580.4        | 3.3     | 0.0442*                                        |
| Treatment                               | 1                  | 52939.4         | 52939.4      | 303.9   | <0.0001*                                       |
| Light Intensity X Cell Type             | 1                  | 769.3           | 769.3        | 4.4     | 0.0409*                                        |
| Cell Type X Treatment                   | 2                  | 16139.6         | 8069.8       | 46.3    | <0.0001*                                       |
| Light Intensity X Cell Type X Treatment | 2                  | 1010.5          | 505.3        | 2.9     | 0.06                                           |
| Error                                   | 48                 | 8361.6          | 174.2        |         |                                                |

**TABLE S20.** A three-way ANOVA was conducted that examined the effect that cell type, light intensity, and pre-encapsulation treatment with catalase has on the intensity of DCF fluorescence exhibited by a cell-hydrogel disk prepared with Irgacure. There was not a statistically significant interaction between the effect of light intensity, the effect of cell type, and the effect of treatment on the percentage of DCF positive cells (F=2.30 p=0.0647).

**TABLE S21.** Results of Two-Way ANOVA: Analyzing the Factors Cell Type and Pre-encapsulation Treatment on the intensity of green fluorescence DCF present in cell-hydrogels prepared with VA086 and photocrosslinked with the HLED light source.

| Source of Variation   | Degrees of Freedom | Sums of Squares | Means Square | F Ratio | P value (probability of making type one error) |
|-----------------------|--------------------|-----------------|--------------|---------|------------------------------------------------|
| Cell Type             | 2                  | 45782.0         | 22891.0      | 6.5     | 0.0075*                                        |
| Treatment             | 1                  | 1830985.0       | 1830985.0    | 51.9    | <0.0001*                                       |
| Cell Type X Treatment | 2                  | 443849.9        | 221925.0     | 6.3     | 0.0085*                                        |
| Error                 | 18                 | 634519.8        | 35251.0      |         |                                                |

**TABLE S21.** A two-way ANOVA was conducted that examined the effect that cell type and pre-encapsulation treatment with catalase has on the intensity of DCF fluorescence exhibited by a cell-hydrogel disk prepared with VA086 and photocrosslinked with the HLED light source. There was a statistically significant interaction between the effect of cell type and the effect of treatment on the percentage of DCF positive cells (F=6.30 p=0.0085\*).



**TABLE S22.** Results of Two-Way ANOVA: Analyzing the Factors Cell Type and Pre-encapsulation Treatment on the intensity of green fluorescence DCF present in cell-hydrogels prepared with VA086 and photocrosslinked with the lamp light source.

| Source of Variation   | Degrees of Freedom | Sums of Squares | Means Square | F Ratio | P value (probability of making type one error) |
|-----------------------|--------------------|-----------------|--------------|---------|------------------------------------------------|
| Cell Type             | 2                  | 1617.0          | 808.5        | 19.5    | <0.0001*                                       |
| Treatment             | 1                  | 21938.2         | 21938.2      | 528.3   | <0.0001*                                       |
| Cell Type X Treatment | 2                  | 1886.5          | 943.3        | 22.7    | <0.0001*                                       |
| Error                 | 18                 | 747.5           | 41.5         |         |                                                |

**TABLE S22.** A two-way ANOVA was conducted that examined the effect that cell type and pre-encapsulation treatment with catalase has on the intensity of DCF fluorescence exhibited by a cell-hydrogel disk prepared with VA086 after photocrosslinking with the lamp light source. There was a statistically significant interaction between the effect of cell type and the effect of treatment on the percentage of DCF positive cells (F=22.7 p<0.0001).

**TABLE S23.** Results of Three-Way ANOVA: Analyzing the Factors Cell Type, Light Intensity, and Pre-encapsulation Treatment on the percentage of live cells in cell-hydrogels prepared with Irgacure.

| Source of Variation                     | Degrees of Freedom | Sums of Squares | Means Square | F Ratio | P value (probability of making type one error) |
|-----------------------------------------|--------------------|-----------------|--------------|---------|------------------------------------------------|
| Light Intensity                         | 1                  | 726.5           | 726.5        | 13.9    | 0.007*                                         |
| Cell Type                               | 2                  | 11645.7         | 5822.9       | 111.6   | <0.0001*                                       |
| Light Intensity X Cell Type             | 2                  | 460.3           | 230.2        | 4.4     | 0.0193*                                        |
| Treatment                               | 1                  | 2081.9          | 2081.9       | 39.9    | <0.0001*                                       |
| Light Intensity X Treatment             | 1                  | 23.1            | 23.1         | 0.4     | 0.51                                           |
| Cell Type X Treatment                   | 2                  | 3071.4          | 1535.7       | 29.4    | <0.0001*                                       |
| Light Intensity X Cell Type X Treatment | 2                  | 47.4            | 73.7         | 1.4     | 0.26                                           |
| Error                                   | 36                 | 1877.8          | 52.2         |         |                                                |

**TABLE S23.** A three-way ANOVA was conducted to examine the effect that cell type, light intensity, and pre-encapsulation treatment with catalase has on the percentage of live cells at day 3 in culture in a cell-hydrogel disk prepared with Irgacure. There was not a statistically significant interaction between the effect of light intensity, the effect of cell type, and the effect of treatment on the percentage of live cells ( $F=1.41$   $p=0.26$ ), but there was a significant interaction between effect of cell type and effect of catalase treatment ( $F=29.44$   $p<0.0001^*$ ).

**TABLE S24.** Results of Three-Way ANOVA: Analyzing the Factors Cell Type, Light Intensity, and Pre-encapsulation Treatment on the percentage of live cells in cell-hydrogels prepared with VA086.

| Source of Variation                     | Degrees of Freedom | Sums of Squares | Means Square | F Ratio | P value (probability of making type one error) |
|-----------------------------------------|--------------------|-----------------|--------------|---------|------------------------------------------------|
| Light Intensity                         | 1                  | 4297.3          | 4297.3       | 42.5    | <0.0001*                                       |
| Cell Type                               | 2                  | 29466.6         | 14733.3      | 145.8   | <0.0001*                                       |
| Light Intensity X Cell Type             | 2                  | 458.3           | 229.2        | 2.3     | 0.12                                           |
| Treatment                               | 1                  | 12.6            | 12.6         | 0.1     | 0.73                                           |
| Light Intensity X Treatment             | 1                  | 35.1            | 35.1         | 0.3     | 0.56                                           |
| Cell Type X Treatment                   | 2                  | 3531.0          | 1765.5       | 17.5    | <0.0001*                                       |
| Light Intensity X Cell Type X Treatment | 2                  | 312.6           | 156.3        | 1.5     | 0.23                                           |
| Error                                   | 35                 | 3536.3          | 101.0        |         |                                                |

**TABLE S24.** A three-way ANOVA was conducted to examine the effect that cell type, light intensity, and pre-encapsulation treatment with catalase has on the percentage of live cells at day 3 in culture in a cell-hydrogel disk prepared with VA086. There was not a statistically significant interaction between the effect of light intensity, the effect of cell type, and the effect of treatment on the percentage of live cells ( $F=1.5470$   $p=0.2271$ ), but there was a significant interaction between effect of cell type and effect of catalase treatment ( $F=17.4736$   $p<0.0001^*$ ).

TABLE S25: Results of Three-Way ANOVA: Analyzing the Factors Cell Type, Light Intensity, and Pre-encapsulation Treatment on the circularity of live cells in cell-hydrogels prepared with Irgacure.

| Source of Variation                     | Degrees of Freedom | Sums of Squares | Means Square | F Ratio | P value (probability of making type one error) |
|-----------------------------------------|--------------------|-----------------|--------------|---------|------------------------------------------------|
| Light Intensity                         | 1                  | 0.1371          | 0.1371       | 68.9457 | <0.0001*                                       |
| Cell Type                               | 2                  | 0.0315          | 0.0157       | 7.9090  | 0.001400                                       |
| Light Intensity X Cell Type             | 2                  | 0.0036          | 0.0018       | 0.8941  | 0.417900                                       |
| Treatment                               | 1                  | 0.0001          | 0.0001       | 0.0781  | 0.786500                                       |
| Light Intensity X Treatment             | 1                  | 0.0014          | 0.0014       | 0.7281  | 0.399100                                       |
| Cell Type X Treatment                   | 2                  | 0.0014          | 0.0007       | 9.1929  | 0.0006*                                        |
| Light Intensity X Cell Type X Treatment | 2                  | 0.0366          | 0.0183       | 3.4696  | 0.0419*                                        |
| Error                                   | 36                 | 0.0717          | 0.0020       |         |                                                |

TABLE S25: A three-way ANOVA was conducted to examine the effect that cell type, light intensity, and pre-encapsulation treatment with catalase has on the circularity of live cells at day 3 in culture in a cell-hydrogel disk prepared with Irgacure. There was a statistically significant interaction between the effect of catalase treatment, the effect of light intensity, and the effect of cell type ( $F=3.469$   $p=<0.0419^*$ ).

**TABLE S26:** Results of Three-Way ANOVA: Analyzing the Factors Cell Type, Light Intensity, and Pre-encapsulation Treatment on the circularity of live cells in cell-hydrogels prepared with VA086.

| Source of Variation                     | Degrees of Freedom | Sums of Squares | Means Square | F Ratio | P value (probability of making type one error) |
|-----------------------------------------|--------------------|-----------------|--------------|---------|------------------------------------------------|
| Light Intensity                         | 1                  | 0.0894          | 0.0894       | 30.1467 | <0.0001*                                       |
| Cell Type                               | 2                  | 0.0679          | 0.0340       | 11.4492 | <0.0001*                                       |
| Light Intensity X Cell Type             | 2                  | 0.0870          | 0.0435       | 14.6654 | <0.0001*                                       |
| Treatment                               | 1                  | 0.0217          | 0.0217       | 7.3198  | 0.0105*                                        |
| Light Intensity X Treatment             | 1                  | 0.0001          | 0.0001       | 0.0179  | 0.894200                                       |
| Cell Type X Treatment                   | 2                  | 0.0157          | 0.0079       | 2.1197  | 0.135200                                       |
| Light Intensity X Cell Type X Treatment | 2                  | 0.0807          | 0.0403       | 13.5989 | <0.0001*                                       |
| Error                                   | 35                 | 0.1038          | 0.0030       |         |                                                |

**TABLE S26:** A three-way ANOVA was conducted to examine the effect that cell type, light intensity, and pre-encapsulation treatment with catalase has on the circularity of live cells at day 3 in culture in a cell-hydrogel disk prepared with VA086. There was a statistically significant interaction between the effect of catalase treatment, the effect of light intensity, and the effect of cell type ( $F=13.5989$   $p<0.0001^*$ ).
